# Supplementary material for: Characterization and Transposon Mutagenesis of the Maize (Zea mays) Pho1 Gene Family
Source: PubMed Central journal article supplement (PMC5029887; doi:10.1371/journal.pone.0161882), 2016-09-20
Supplement: pone.0161882.s001.pdf [file pone.0161882.s001.pdf]

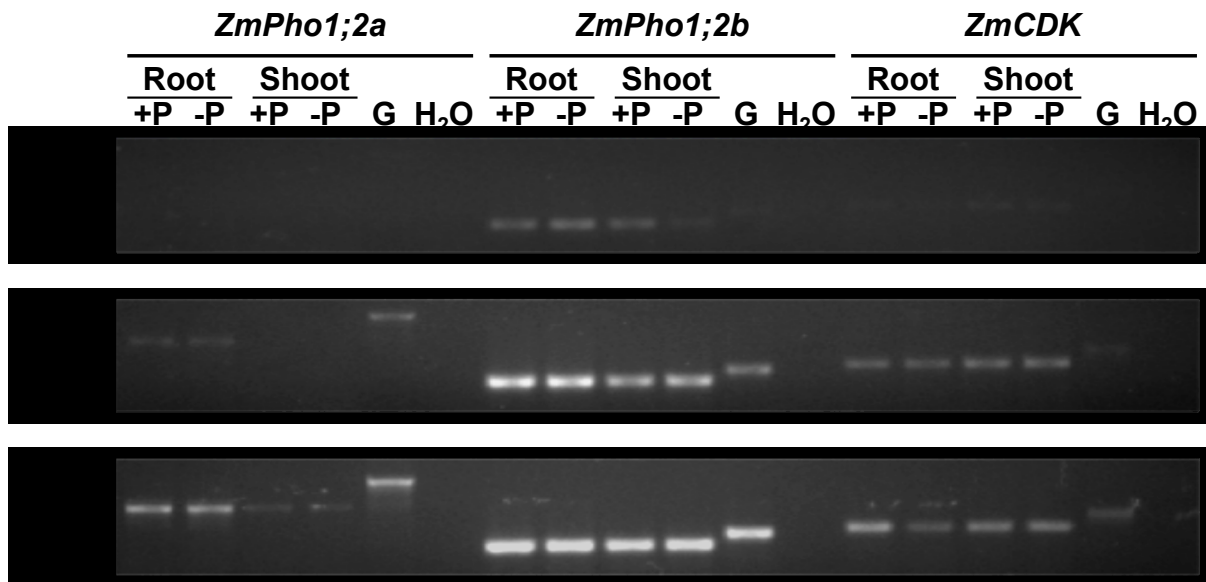

Accumulation of *Pho1;2* sense transcripts under contrasting phosphate conditions. Amplification of fragments corresponding to the mature sense-RNAs of *ZmPho1;2a* and *ZmPho1;2b* from oligo-dT primed cDNA prepared from roots and shoot of 10-day-old B73 seedlings, fertilized with Hoagland solution adjusted to 1mM (+P) or 0mM (-P) inorganic phosphate. PCR was run for 27 (27X), 32 (32X) or 37 (37X) cycles. Amplification of *ZmCDK* and amplification from genomic DNA template (G) were used as controls.

## Salazar-Vidal et al. Supplementary Figure 1B

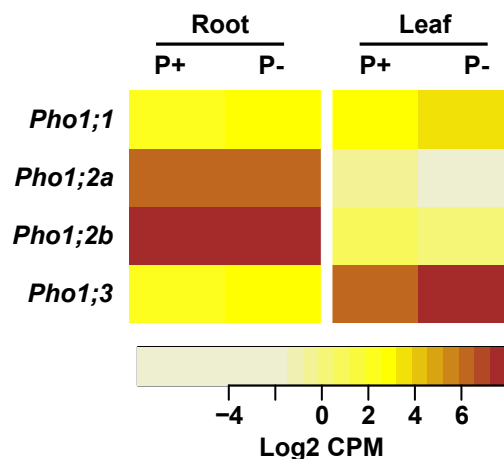

Accumulation of *Pho1;2* sense transcripts detected by RNA sequencing. RNA was extracted from roots and leaves of 21-day old B73 seedlings fertilized with 1000 $\mu$ M (P+) or 10 $\mu$ M (P-) phosphate, and used to generate libraries for RNA sequencing as previously described (González-Muñoz et al., 2015). Data presented as Log<sub>2</sub> counts per million (CPM).
